# Supplementary material for: Associations between urine cobalt and prevalence of kidney stones in American s aged ≥ 20 years old
Source: Research Square preprint supplement (doi:10.21203/rs.3.rs-1457171/v1), 2022-04-08
Supplement: Supplementary file 1 [file 603836821b7ccbae70ca2a2e.pdf]

| Exposure                               | N     | Non-adjusted model*  |          | Core model**         |          | Fully adjustment model*** |          |
|----------------------------------------|-------|----------------------|----------|----------------------|----------|---------------------------|----------|
|                                        |       | OR (95% CI)          | P value  | OR (95% CI)          | P value  | OR (95%CI)                | P value  |
| Urine Cobalt (ug/L)                    | 10744 | 1.059 (1.018, 1.102) | 0.00430  | 1.050 (1.009, 1.092) | 0.01511  | 1.048 (1.005, 1.093)      | 0.02993  |
| <b>Quartile of Urine Cobalt (ug/L)</b> |       |                      |          |                      |          |                           |          |
| 0.02-0.22                              | 2669  | 1.00000              |          | 1.00000              |          | 1.00000                   |          |
| 0.22-0.36)                             | 2691  | 1.265 (1.043, 1.533) | 0.01670  | 1.252 (1.031, 1.522) | 0.02357  | 1.166 (0.955, 1.422)      | 0.13116  |
| 0.36-0.58                              | 2693  | 1.369 (1.132, 1.655) | 0.00119  | 1.395 (1.151, 1.691) | 0.00070  | 1.348 (1.108, 1.640)      | 0.00282  |
| 0.58-37.40                             | 2691  | 1.562 (1.297, 1.880) | <0.00001 | 1.783 (1.476, 2.155) | <0.00001 | 1.683 (1.386, 2.044)      | <0.00001 |

**P value for trend**

**<0.00001**

**<0.00001**

**<0.00001**

**CI = confidence interval; OR = odds ratio**

**\*Non-adjusted model adjusts for: None;**

**\*\*Core model adjust for: gender; age; race;**

**\*\*\*Fully adjustment model adjusts for: gender; age; race; education; marital; PIR; BMI; smoking; alcohol; HBP; diabetes; CHF; cancer; gout; vigorous activity; moderate activity**

**Table3: Multivariate-adjusted odds of urine cobalt in all participants, and the correlation between quartile of urine cobalt and kidney stones**
