# Supplementary material for: Associations between urine cobalt and prevalence of kidney stones in American s aged ≥ 20 years old
Source: Research Square preprint supplement (doi:10.21203/rs.3.rs-1457171/v1), 2022-04-08
Supplement: Supplementary file 2 [file 99776e66bf5495c1ed8f9cfd.pdf]

| Characteristics                                       | Without Kidney Stones<br>(n= 9703) | With Kidney Stones<br>(n= 1041) | P value |
|-------------------------------------------------------|------------------------------------|---------------------------------|---------|
| <b>Age (year) (mean ± SD)</b>                         | 46.85 ± 16.71                      | 52.95 ± 15.23                   | <0.0001 |
| 20-34 (%)                                             | 28.32                              | 14.61                           |         |
| 35-49 (%)                                             | 28.5                               | 23.35                           |         |
| 50-64 (%)                                             | 26.12                              | 38.16                           |         |
| ≥65 (%)                                               | 17.06                              | 23.88                           |         |
| <b>Poverty Income Ratio (mean ± SD)</b>               | 2.99 ± 1.65                        | 2.94 ± 1.61                     | 0.3425  |
| ≤1.3 (%)                                              | 19.88                              | 20.87                           |         |
| >1.3 and ≤3.5 (%)                                     | 32.89                              | 35.45                           |         |
| >3.5 (%)                                              | 39.09                              | 36.74                           |         |
| Missing (%)                                           | 8.14                               | 6.94                            |         |
| <b>Body Mass Index (kg/m<sup>2</sup>) (mean ± SD)</b> | 28.88 ± 6.77                       | 30.31 ± 6.65                    | <0.0001 |
| <25 (%)                                               | 30.77                              | 20.18                           |         |
| 25-30 (%)                                             | 32.72                              | 33.01                           |         |
| ≥30 (%)                                               | 36.51                              | 46.81                           |         |
| <b>Urine Cobalt (ug/L) (mean ± SD)</b>                | 0.53 ± 1.17                        | 0.65 ± 2.01                     | 0.0032  |
| <b>Gender (%)</b>                                     |                                    |                                 | <0.0001 |
| Male                                                  | 48.3                               | 57.37                           |         |
| Female                                                | 51.7                               | 42.63                           |         |
| <b>Race (%)</b>                                       |                                    |                                 | <0.0001 |
| Mexican American                                      | 9.08                               | 5.5                             |         |
| Other Hispanic                                        | 6.01                               | 5.78                            |         |
| Non-Hispanic white                                    | 64.93                              | 75.63                           |         |
| Non-Hispanic black                                    | 11.86                              | 5.96                            |         |
| Other races                                           | 8.12                               | 7.13                            |         |
| <b>Education (%)</b>                                  |                                    |                                 | 0.1725  |
| Less than 9th grade                                   | 5.84                               | 5.03                            |         |
| 9-11th grade                                          | 10.17                              | 11.03                           |         |
| High school graduate                                  | 23.2                               | 25.04                           |         |
| Some college                                          | 31.05                              | 32.14                           |         |
| College graduate or above                             | 29.74                              | 26.76                           |         |
| <b>Marital Status (%)</b>                             |                                    |                                 | <0.0001 |
| Married                                               | 53.93                              | 62.43                           |         |
| Widowed                                               | 5.51                               | 5.84                            |         |
| Divorced                                              | 10.02                              | 14.19                           |         |
| Separated                                             | 2.42                               | 1.78                            |         |
| Never married                                         | 19.26                              | 9.75                            |         |
| Living with a partner                                 | 8.86                               | 6                               |         |

|                                     |       |       |         |
|-------------------------------------|-------|-------|---------|
| <b>Smoking (%)</b>                  |       |       | 0.0006  |
| <100 cigarettes in life             | 55.89 | 50.37 |         |
| ≥100 cigarettes in life             | 44.11 | 49.63 |         |
| <b>Alcohol (%)</b>                  |       |       | 0.1906  |
| <12 drinks/year                     | 16.84 | 17.17 |         |
| ≥12 drinks/year                     | 58.84 | 61.02 |         |
| Missing                             | 24.32 | 21.81 |         |
| <b>High Blood Pressure (%)</b>      |       |       | <0.0001 |
| No                                  | 69.65 | 55.16 |         |
| Yes                                 | 30.35 | 44.84 |         |
| <b>Diabetes (%)</b>                 |       |       | <0.0001 |
| No                                  | 89.18 | 76.83 |         |
| Yes                                 | 8.64  | 18.95 |         |
| Missing                             | 2.18  | 4.22  |         |
| <b>Congestive Heart Failure (%)</b> |       |       | <0.0001 |
| No                                  | 98.21 | 95.62 |         |
| Yes                                 | 1.79  | 4.38  |         |
| <b>Cancer (%)</b>                   |       |       | <0.0001 |
| No                                  | 90.57 | 83.68 |         |
| Yes                                 | 9.43  | 16.32 |         |
| <b>Gout (%)</b>                     |       |       | <0.0001 |
| No                                  | 96.17 | 92.86 |         |
| Yes                                 | 3.83  | 7.14  |         |
| <b>Vigorous activity (%)</b>        |       |       | <0.0001 |
| No                                  | 73.32 | 81.23 |         |
| Yes                                 | 26.68 | 18.77 |         |
| <b>Moderate activity (%)</b>        |       |       | 0.6179  |
| No                                  | 54.49 | 55.97 |         |
| Yes                                 | 45.51 | 44.03 |         |

**For continuous variables, the t-test for slope was used in generalized linear models. Values are expressed as means+SE or %. SE=standard error; BMI = body mass index; PIR = Poverty Income Ratio; HBP = High Blood Pressure; CHF = Congestive Heart Failure.**

**Table 2: Characteristics of 10,744 participants in NHANES between 2007 and 2018**
