# Supplementary material for: Associations between urine cobalt and prevalence of kidney stones in American s aged ≥ 20 years old
Source: Research Square preprint supplement (doi:10.21203/rs.3.rs-1457171/v1), 2022-04-08
Supplement: Supplementary file 3 [file a047859b2810d12e684bba59.pdf]

| Characteristics                                       | All<br>(n = 10744) | Urine Cobalt<br>0.02-0.22 (n =<br>2669) | Urine Cobalt<br>0.22-0.36 (n =<br>2691) | Urine Cobalt<br>0.36-0.58 (n =<br>2693) | Urine Cobalt<br>0.58-37.40 (n<br>=2691) | P value |
|-------------------------------------------------------|--------------------|-----------------------------------------|-----------------------------------------|-----------------------------------------|-----------------------------------------|---------|
| <b>Age (years) (mean ± SD)</b>                        | 47.45 ± 16.67      | 48.21 ± 16.19                           | 49.14 ± 16.60                           | 47.05 ± 16.52                           | 45.47 ± 17.11                           | <0.0001 |
| 20-34 (%)                                             | 26.98              | 24.75                                   | 23.19                                   | 27.38                                   | 32.42                                   |         |
| 35-49 (%)                                             | 27.99              | 27.36                                   | 26.26                                   | 28.54                                   | 29.74                                   |         |
| 50-64 (%)                                             | 27.3               | 30.3                                    | 31.01                                   | 26.83                                   | 21.23                                   |         |
| ≥65 (%)                                               | 17.73              | 17.59                                   | 19.54                                   | 17.25                                   | 16.61                                   |         |
| <b>Poverty Income Ratio (mean ± SD)</b>               | 2.98 ± 1.65        | 3.16 ± 1.65                             | 3.01 ± 1.65                             | 2.99 ± 1.64                             | 2.77 ± 1.63                             | <0.0001 |
| ≤1.3 (%)                                              | 19.97              | 17.9                                    | 19.54                                   | 19.46                                   | 22.95                                   |         |
| >1.3 and ≤3.5 (%)                                     | 33.15              | 31.08                                   | 33.33                                   | 33.72                                   | 34.44                                   |         |
| >3.5 (%)                                              | 38.86              | 44.11                                   | 39.96                                   | 38.12                                   | 33.35                                   |         |
| Missing (%)                                           | 8.02               | 6.91                                    | 7.17                                    | 8.7                                     | 9.26                                    |         |
| <b>Body Mass Index (kg/m<sup>2</sup>) (mean ± SD)</b> | 29.02 ± 6.78       | 28.07 ± 6.27                            | 28.97 ± 6.74                            | 29.48 ± 6.94                            | 29.55 ± 7.02                            | <0.0001 |
| <25 (%)                                               | 29.73              | 35.34                                   | 31.13                                   | 25.44                                   | 27.06                                   |         |
| 25-30 (%)                                             | 32.74              | 34.52                                   | 30.84                                   | 34.73                                   | 30.84                                   |         |
| ≥30 (%)                                               | 37.52              | 30.14                                   | 38.03                                   | 39.83                                   | 42.09                                   |         |
| <b>Urine Cobalt (ug/L) (mean ± SD)</b>                | 0.54 ± 1.28        | 0.14 ± 0.05                             | 0.29 ± 0.04                             | 0.46 ± 0.06                             | 1.28 ± 2.38                             | <0.0001 |
| <b>Kidney stone (%)</b>                               |                    |                                         |                                         |                                         |                                         | 0.0002  |
| No                                                    | 90.19              | 92.06                                   | 89.37                                   | 90.63                                   | 88.71                                   |         |
| Yes                                                   | 9.81               | 7.94                                    | 10.63                                   | 9.37                                    | 11.29                                   |         |
| <b>Gender (%)</b>                                     |                    |                                         |                                         |                                         |                                         | <0.0001 |
| Male                                                  | 49.19              | 47.65                                   | 52.71                                   | 55.46                                   | 41.15                                   |         |
| Female                                                | 50.81              | 52.35                                   | 47.29                                   | 44.54                                   | 58.85                                   |         |
| <b>Race (%)</b>                                       |                    |                                         |                                         |                                         |                                         | 0.0003  |
| Mexican American                                      | 8.73               | 7.36                                    | 8.99                                    | 9.52                                    | 9.05                                    |         |
| Other Hispanic                                        | 5.99               | 5.76                                    | 5.84                                    | 6.02                                    | 6.33                                    |         |
| Non-Hispanic white                                    | 65.98              | 68.98                                   | 66.01                                   | 65.03                                   | 63.9                                    |         |
| Non-Hispanic black                                    | 11.28              | 9.2                                     | 12.05                                   | 11.92                                   | 11.97                                   |         |
| Other races                                           | 8.03               | 8.7                                     | 7.1                                     | 7.51                                    | 8.76                                    |         |
| <b>Education (%)</b>                                  |                    |                                         |                                         |                                         |                                         | 0.0024  |
| Less than 9th grade                                   | 5.76               | 5.93                                    | 5.74                                    | 5.88                                    | 5.5                                     |         |
| 9-11th grade                                          | 10.26              | 9.49                                    | 10.18                                   | 10.98                                   | 10.37                                   |         |
| High school graduate                                  | 23.38              | 21.07                                   | 24.2                                    | 23.62                                   | 24.64                                   |         |
| Some college                                          | 31.15              | 31.42                                   | 29.6                                    | 30.88                                   | 32.65                                   |         |
| College graduate or above                             | 29.45              | 32.1                                    | 30.29                                   | 28.63                                   | 26.84                                   |         |
| <b>Marital Status (%)</b>                             |                    |                                         |                                         |                                         |                                         | 0.0004  |
| Married                                               | 54.76              | 54.87                                   | 57.27                                   | 56.15                                   | 50.88                                   |         |

|                                     |       |       |       |       |         |
|-------------------------------------|-------|-------|-------|-------|---------|
| Widowed                             | 5.54  | 5.86  | 5.93  | 4.93  | 5.45    |
| Divorced                            | 10.43 | 9.93  | 10.7  | 9.91  | 11.19   |
| Separated                           | 2.36  | 2.28  | 2.05  | 2.25  | 2.83    |
| Never married                       | 18.33 | 18.75 | 16.88 | 17.85 | 19.78   |
| Living with a partner               | 8.58  | 8.3   | 7.16  | 8.93  | 9.87    |
| <b>Smoking (%)</b>                  |       |       |       |       | 0.3228  |
| <100 cigarettes in life             | 55.35 | 56.15 | 54.49 | 54.41 | 56.31   |
| ≥100 cigarettes in life             | 44.65 | 43.85 | 45.51 | 45.59 | 43.69   |
| <b>Alcohol (%)</b>                  |       |       |       |       | <0.0001 |
| <12 drinks/year                     | 16.87 | 18    | 15.24 | 15.82 | 18.37   |
| ≥12 drinks/year                     | 59.05 | 61.78 | 63.08 | 59.03 | 52.5    |
| Missing                             | 24.08 | 20.22 | 21.69 | 25.15 | 29.13   |
| <b>High Blood Pressure (%)</b>      |       |       |       |       | 0.0001  |
| No                                  | 68.23 | 68.69 | 64.71 | 69.57 | 69.84   |
| Yes                                 | 31.77 | 31.31 | 35.29 | 30.43 | 30.16   |
| <b>Diabetes (%)</b>                 |       |       |       |       | <0.0001 |
| No                                  | 87.97 | 89.12 | 85.88 | 88.02 | 88.79   |
| Yes                                 | 9.65  | 9.06  | 11.97 | 9.52  | 8.14    |
| Missing                             | 2.38  | 1.82  | 2.15  | 2.46  | 3.07    |
| <b>Congestive Heart Failure (%)</b> |       |       |       |       | 0.0117  |
| No                                  | 97.96 | 98.57 | 97.72 | 98.16 | 97.37   |
| Yes                                 | 2.04  | 1.43  | 2.28  | 1.84  | 2.63    |
| <b>Cancer (%)</b>                   |       |       |       |       | 0.0022  |
| No                                  | 89.9  | 91.53 | 88.59 | 90.23 | 89.19   |
| Yes                                 | 10.1  | 8.47  | 11.41 | 9.77  | 10.81   |
| <b>Gout (%)</b>                     |       |       |       |       | 0.0333  |
| No                                  | 95.85 | 95.41 | 95.16 | 96.53 | 96.26   |
| Yes                                 | 4.15  | 4.59  | 4.84  | 3.47  | 3.74    |
| <b>Vigorous activity (%)</b>        |       |       |       |       | 0.3916  |
| No                                  | 74.1  | 72.96 | 74.54 | 74    | 74.89   |
| Yes                                 | 25.9  | 27.04 | 25.46 | 26    | 25.11   |
| <b>Moderate activity (%)</b>        |       |       |       |       | <0.0001 |
| No                                  | 54.64 | 50.65 | 55.87 | 55.74 | 56.31   |
| Yes                                 | 45.36 | 49.35 | 44.13 | 44.26 | 43.69   |

**For continuous variables, the t-test for slope was used in generalized linear models.**

**Values are expressed as means+SE or %. SE=standard error; BMI = body mass index; PIR = Poverty Income Ratio; HBP = High Blood Pressure; CHF = Congestive Heart Failure.**

**Table 1: Characteristics of participants by categories of urine cobalt content: NHANES 2007–2018**
